# Supplementary material
Source: Springer Nature journal article supplement (https://www.springermedizin.de/resource/supplementary/13012_2006_9_MOESM1_ESM.pdf/9628938)
Supplement: MOESM1 [file 9628938]

Receive Feedback

Timely?

yes

no

No effect on performance

Individualized?

yes

no

Diminished effect on performance

Non-Punitive?

yes

no

Diminished or negative effect on performance

Customizable?

yes

no

Possibly diminished effect on performance

Optimal\* effect on performance
